# Supplementary material for: Optimizing the noise versus bias trade-off for Illumina whole genome expression BeadChips
Source: PubMed Central journal article supplement — Nucleic Acids Res. 2010 Oct 6;38(22):e204. doi: 10.1093/nar/gkq871 (PMC3001098; doi:10.1093/nar/gkq871), 2010-10-06
Supplement: supp_gkq871_supp.pdf [file supp_gkq871_supp.pdf]

# Optimizing the noise versus bias trade-off for Illumina Whole Genome Expression BeadChips

Wei Shi<sup>1</sup>, Alicia Oshlack<sup>1</sup> and Gordon K Smyth<sup>1,2</sup>

<sup>1</sup>*The Walter and Eliza Hall Institute of Medical Research, 1G Royal Parade, Parkville,  
VIC 3052,*

<sup>2</sup>*The Department of Mathematics and Statistics, The University of Melbourne, Parkville,  
VIC 3010, Australia*

# 1 Supplementary Figures and Tables

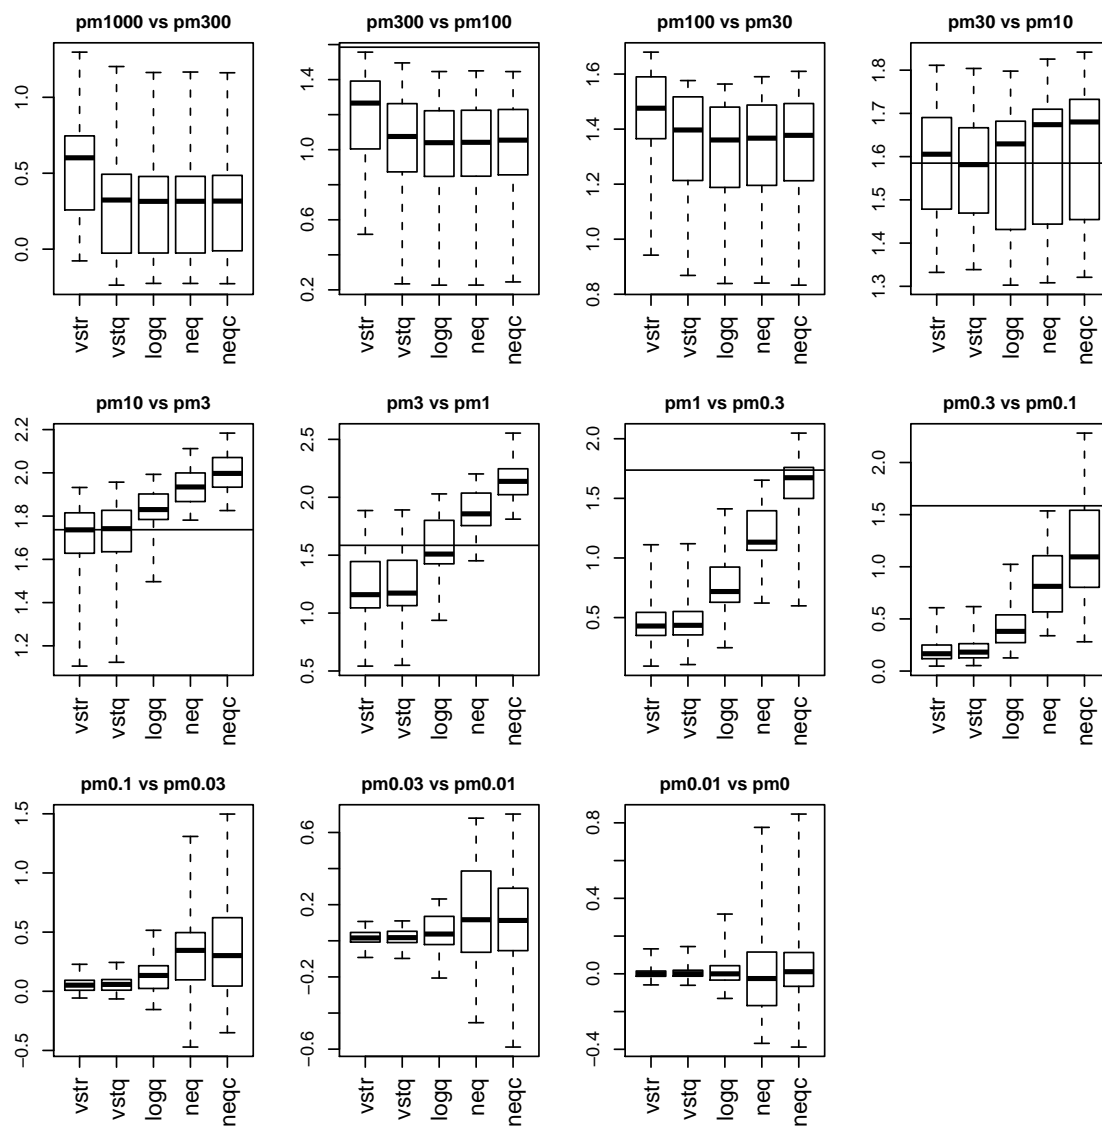

**Figure S1:** Observed  $\log_2$  fold-changes between closest nominal spike-in concentrations for each pre-processing strategy. The horizontal lines represent the ideal  $\log_2$  fold-changes. Results shown are for dataset S1 (Results are similar for dataset S2).

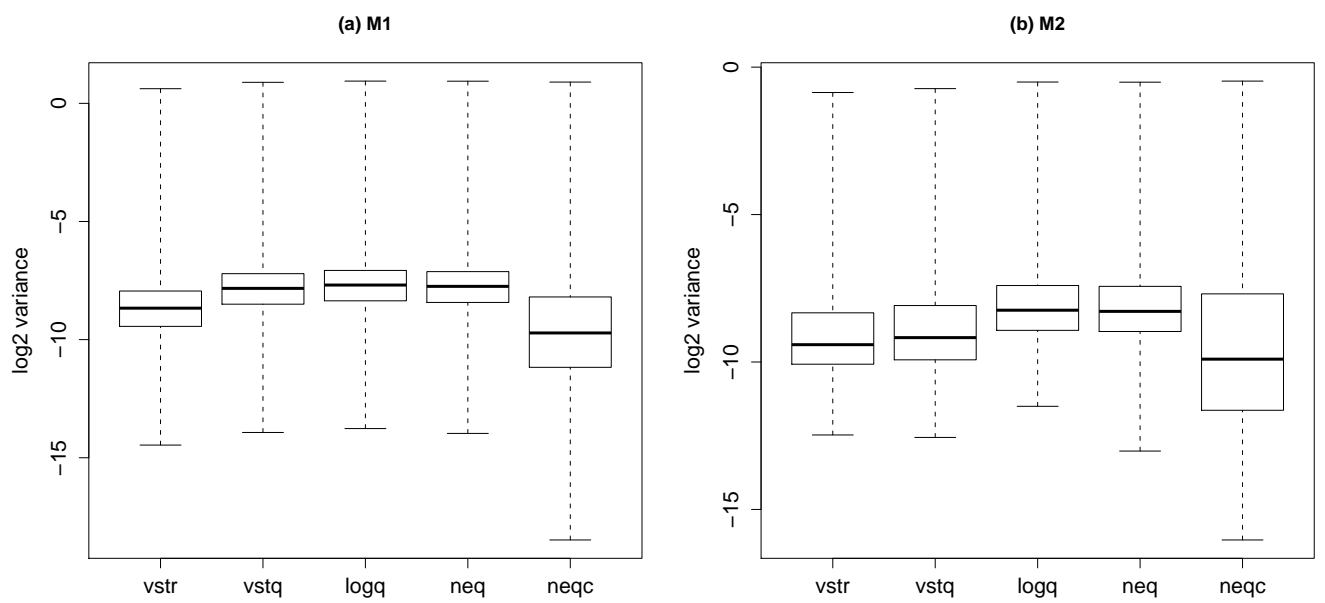

**Figure S2:** Precision comparison for alternative pre-processing strategies when their total offsets are forced equal. (a) Dataset M1. (b) Dataset M2.

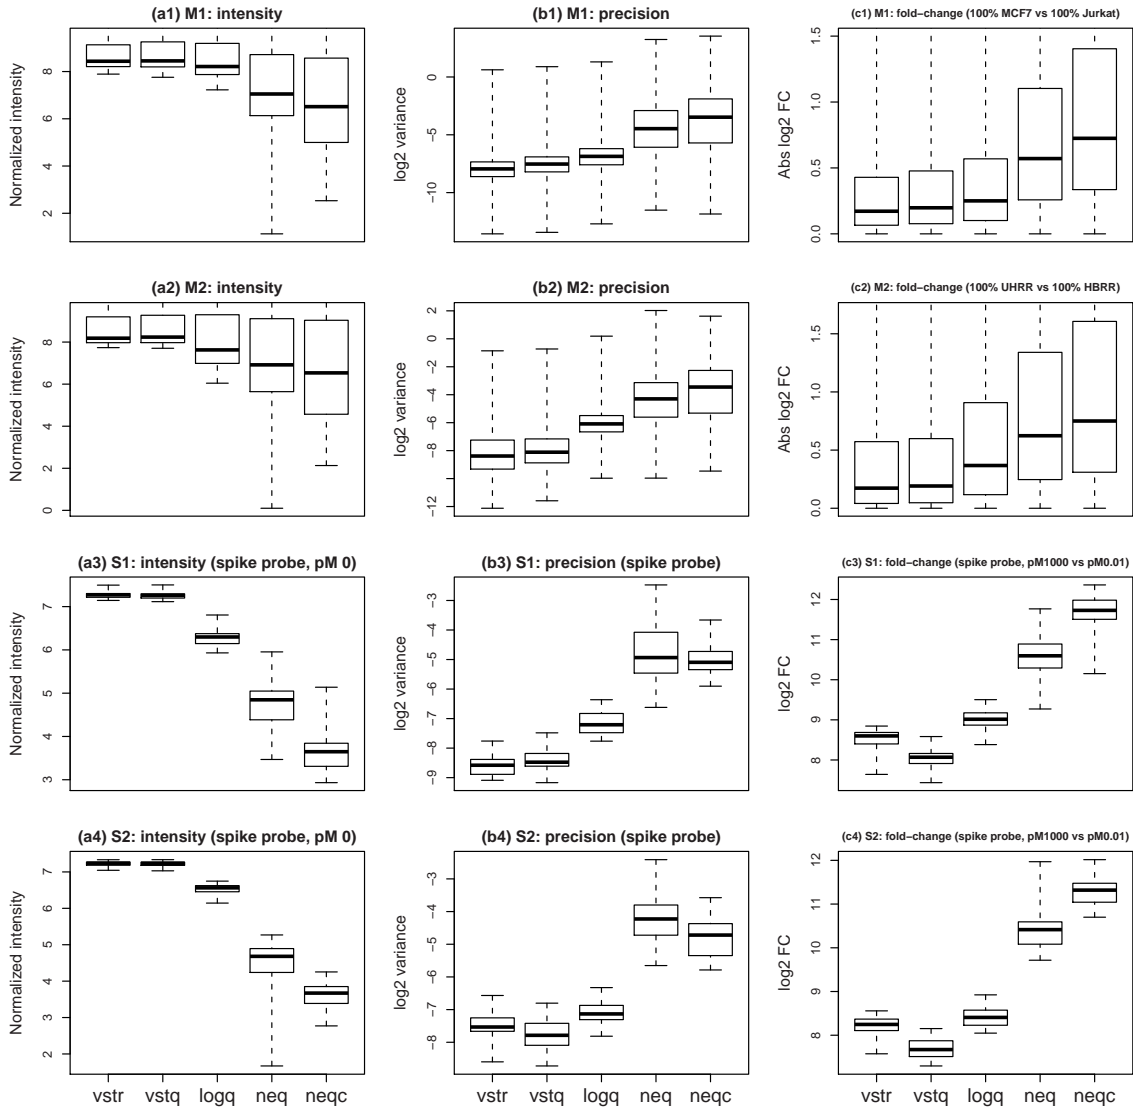

**Figure S3:** Intensity range, precision and fold-change range measured for each pre-processing strategy using filtered data.

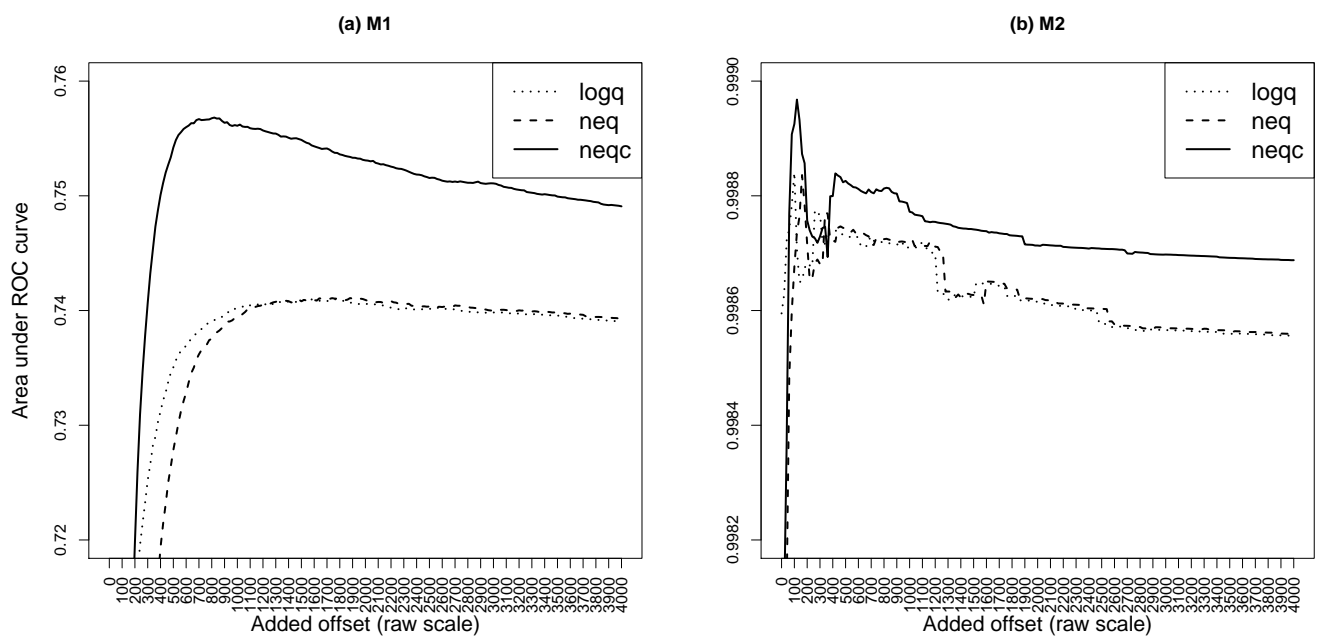

**Figure S4:** Change of AUC values with the increase of added offset for logq, neq and neqc strategies using filtered data. (a) Dataset M1. (b) Dataset M2.

**Table S1:** Innate offset, precision and bias measured for each pre-processing strategy using filtered data on mixture datasets M1 and M2

| Strategy    | M1            |              |             | M2            |              |             |
|-------------|---------------|--------------|-------------|---------------|--------------|-------------|
|             | Innate offset | $\log_2$ var | 90% logFC   | Innate offset | $\log_2$ var | 90% logFC   |
| vstr        | 264           | <b>-7.9</b>  | 0.84        | 227           | <b>-8.4</b>  | 1.22        |
| vstq        | 253           | -7.5         | 0.92        | 226           | -8.1         | 1.27        |
| logq        | 190           | -6.9         | 1.07        | 90            | -6.1         | 1.76        |
| neq         | 25            | -4.5         | 1.98        | 14            | -4.3         | 2.47        |
| <b>neqc</b> | <b>11</b>     | -3.5         | <b>2.54</b> | <b>7</b>      | -3.5         | <b>2.99</b> |

Note that the innate offset is measured as the 1% quantile of normalized intensities for the filtered data.

**Table S2:** Comparing different strategies using filtered data when their false discovery rates are forced equal

| Dataset | Strategy    | Added offset | Total offset | AUC    | 90% logFC   |
|---------|-------------|--------------|--------------|--------|-------------|
| M1      | vstr        | -            | 264          | 0.712  | 0.84        |
|         | vstq        | -            | 253          | 0.693  | 0.92        |
|         | logq        | 182          | 375          | 0.712  | 0.80        |
|         | neq         | 345          | 370          | 0.712  | 0.80        |
|         | <b>neqc</b> | <b>177</b>   | <b>188</b>   | 0.712  | <b>1.10</b> |
| M2      | vstr        | -            | 227          | 0.9987 | 1.22        |
|         | vstq        | -            | 226          | 0.9988 | 1.27        |
|         | logq        | 70           | 160          | 0.9988 | 1.50        |
|         | neq         | 147          | 161          | 0.9988 | 1.50        |
|         | <b>neqc</b> | <b>59</b>    | <b>66</b>    | 0.9988 | <b>1.98</b> |

**Table S3:** Comparing different strategies using filtered data when their total offsets are forced equal

| Dataset | Strategy    | Added offset | Total offset | AUC           | 90% logFC   |
|---------|-------------|--------------|--------------|---------------|-------------|
| M1      | vstr        | -            | 264          | 0.712         | 0.84        |
|         | vstq        | -            | 253          | 0.693         | 0.92        |
|         | logq        | 74           | 264          | 0.690         | 0.93        |
|         | neq         | 239          | 264          | 0.690         | 0.93        |
|         | <b>neqc</b> | <b>253</b>   | 264          | <b>0.734</b>  | <b>0.96</b> |
| M2      | vstr        | -            | 227          | 0.9987        | 1.22        |
|         | vstq        | -            | 226          | <b>0.9988</b> | 1.27        |
|         | logq        | 136          | 226          | 0.9986        | 1.36        |
|         | neq         | 212          | 226          | 0.9986        | 1.36        |
|         | <b>neqc</b> | <b>219</b>   | 226          | 0.9987        | <b>1.39</b> |

## 2 A case study

In this section, we use a case study to illustrate how to perform the normalization using the `neqc` pre-processing strategy. A publicly available dataset from Gene Expression Omnibus database (accession number GSE16997) was used in this case study. This database can be accessed via the URL: <http://www.ncbi.nlm.nih.gov/geo/>.

This dataset used two Illumina HumanWG-6 version 3 BeadChips which each includes six arrays. There are four different biological samples in this dataset: mammary stem cells (MS), progenitor luminal cells (pL), mature luminal cells (mL) and fibroblast-enriched stromal cells (stroma). Each sample has three replicates.

To perform the `neqc` normalization, the programming software “R” ([www.r-project.org](http://www.r-project.org)) and Bioconductor R package “limma” (<http://www.bioconductor.org/packages/release/bioc/html/limma.html>) have to be downloaded and installed onto the computer.

Now we show how to read in data, perform the `neqc` normalization, filter out non-expressed probes and discover differentially expressed probes.

Read in data:

```
> library(limma)
> x <- read.ilmn(files="probe profile.txt",ctrlfiles="control probe profile.txt",
+ other.columns="Detection")
```

Read in sample information:

```
> targets <- readTargets()
> targets
```

|    | Ptnumber | Age | Digest | Subpopulation | SampleNo | SentrixBarcode | SampleSection | SecP | Type   |
|----|----------|-----|--------|---------------|----------|----------------|---------------|------|--------|
| 1  | 08RMH263 | 39  | 9hr    | P5(Myo/stem)  | 1        | 4380071023     | A             | P5   | MS     |
| 2  | 08RMH263 | 39  | 9hr    | P6(Stromal)   | 2        | 4380071023     | B             | P6   | stroma |
| 3  | 08RMH263 | 39  | 9hr    | P7(MatureLum) | 3        | 4380071023     | C             | P7   | mL     |
| 4  | 08RMH263 | 39  | 9hr    | P8(ProgenLum) | 4        | 4380071023     | D             | P8   | pL     |
| 5  | 08RMH313 | 57  | 9hr    | P5(Myo/stem)  | 5        | 4380071023     | E             | P5   | MS     |
| 6  | 08RMH313 | 57  | 9hr    | P6(Stromal)   | 6        | 4380071023     | F             | P6   | stroma |
| 7  | 08RMH313 | 57  | 9hr    | P7(MatureLum) | 7        | 4380071027     | A             | P7   | mL     |
| 8  | 08RMH313 | 57  | 9hr    | P8(ProgenLum) | 8        | 4380071027     | B             | P8   | pL     |
| 9  | 08RMH434 | 21  | 5hr    | P5(Myo/stem)  | 9        | 4380071027     | C             | P5   | MS     |
| 10 | 08RMH434 | 21  | 5hr    | P6(Stromal)   | 10       | 4380071027     | D             | P6   | stroma |
| 11 | 08RMH434 | 21  | 5hr    | P7(MatureLum) | 11       | 4380071027     | E             | p7   | mL     |
| 12 | 08RMH434 | 21  | 5hr    | P8(ProgenLum) | 12       | 4380071027     | F             | p8   | pL     |

Perform `neqc` normalization (the `neqc()` function implemented the `neqc` pre-processing strategy) :

```
> y <- neqc(x)
```

Filter out probes which were not expressed in all samples:

```
> expressed <- apply(y$other$Detection < 0.05,1,any)
> y <- y[expressed,]
```

Carry out differential expression analysis and get the number of differentially expressed genes under false discovery rate of 5%:

```
> ct <- factor(targets$Type)
> design <- model.matrix(~0+ct)
> colnames(design) <- levels(ct)
> fit <- lmFit(y,design)
> contrasts <- makeContrasts(MS-mL, MS-pL, mL-pL, levels=design)
> contrasts.fit <- eBayes(contrasts.fit(fit, contrasts))
> summary(decideTests(contrasts.fit, method="global"))
      MS - mL MS - pL mL - pL
-1    2724    2377    1235
 0    23273   23924   25941
 1     2461    2157    1282
```

Display top 10 differentially expressed genes between samples “MS” and “mL”.

```
> topTable(contrasts.fit, coef=1)
      PROBE_ID  SYMBOL logFC AveExpr      t P.Value adj.P.Val  B
13343 ILMN_1766707  IL17B  3.16   6.78  52.5 6.71e-13 1.91e-08 17.5
3907  ILMN_1783149  CDH23  3.26   7.60  41.4 6.20e-12 8.82e-08 16.4
25182 ILMN_1728496  SYT9 -1.98   6.50 -33.8 4.06e-11 2.99e-07 15.2
5191  ILMN_1708303  CYP4F22 -3.04   6.77 -33.7 4.20e-11 2.99e-07 15.2
15261 ILMN_1669819  LOC402569 -1.67   6.40 -32.4 6.03e-11 3.43e-07 14.9
1091  ILMN_1777998  ARHGAP25  3.77   7.03  31.4 8.14e-11 3.86e-07 14.7
18639 ILMN_1676088  MSRB3  5.45   8.51  30.8 9.63e-11 3.92e-07 14.6
8474  ILMN_2413323   GRP  5.58   7.53  28.8 1.82e-10 6.47e-07 14.1
26055 ILMN_1811426  TMTC1  4.50   7.72  28.3 2.13e-10 6.74e-07 14.0
24370 ILMN_1701933  SNCA  4.18   7.07  26.8 3.58e-10 9.62e-07 13.6
```
